# Supplementary material
Source: publisher figshare collection journal article supplement (https://tandf.figshare.com/ndownloader/files/17129873)
Supplement: Supplementary file 1 [file 17129873]

**Improvement in molecular alignment of ferroelectric liquid crystals**

**by Co-ZnO/ZnO core/shell quantum dots**

Swapnil Doke a, Prasun Ganguly b and Shailaja Mahamuni a

a Department of Physics, S. P. Pune University, Pune 411 007, India

b Department of Physics, Faculty of Sciences, National Defence Academy, Pune 411 023, India

**Supplementary Information**

**Figure S1**. Fourier Transform Infra Red (FTIR) spectra
